# Supplementary material for: Effect of Oxalic Acid Concentration and Different Mechanical Pre-Treatments on the Production of Cellulose Micro/Nanofibers
Source: MDPI journal article supplement (doi:10.3390/nano12172908), 2022-08-24
Supplement: s1 [file s1]

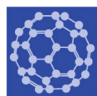

*Supplementary material*

# Effect of Oxalic Acid Concentration and Different Mechanical Pre-Treatments on the Production of Cellulose Micro/Nanofibers

Gabriela Adriana Bastida, Carla Natalí Schnell, Paulina Mocchiutti, Yamil Nahún Solier, María Cristina Inalbon, Miguel Ángel Zanuttini and María Verónica Galván \*

Institute of Cellulosic Technology, Faculty of Chemical Engineering (FIQ-CONICET), National University of the Litoral, Santiago del Estero 2654, S3000AOJ, Santa Fe, Argentina

\* Correspondence: vgalvan@fiq.unl.edu.ar; Tel./Fax: +54-342-4520019

This file includes **Supplementary Figure S1, S2, S3 and S4**



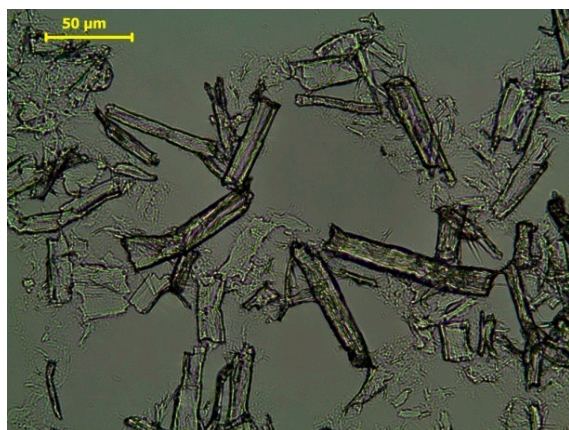

25ox\_Ut\_5P

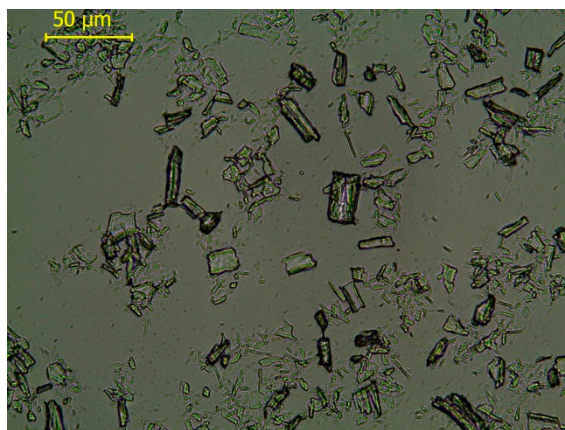

50ox\_Ut\_5P

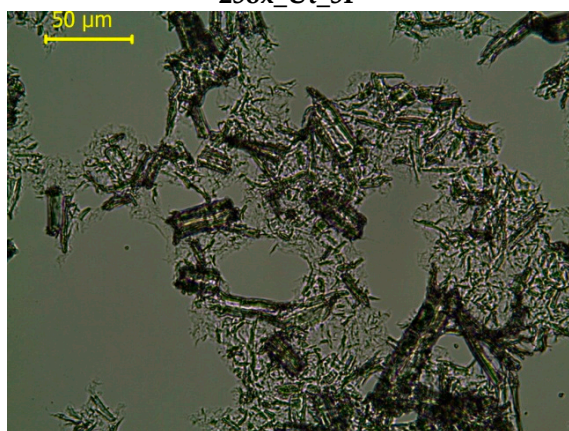

25ox\_Ut\_15P

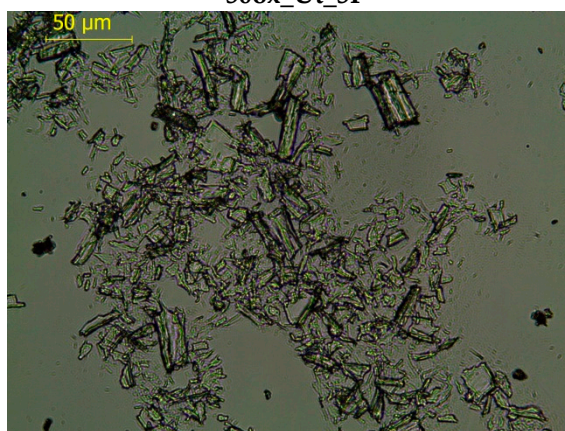

50ox\_Ut\_15P

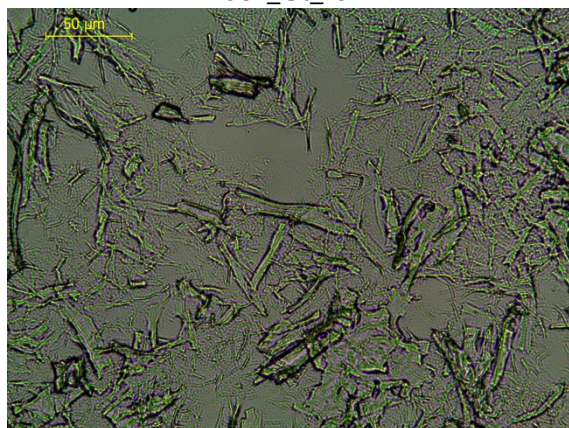

R\_25ox\_5P

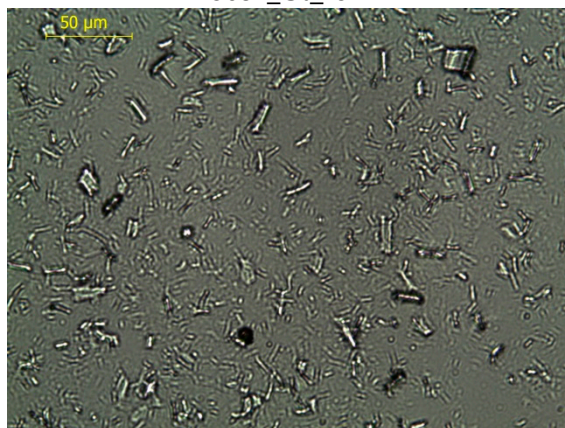

R\_50ox\_5P

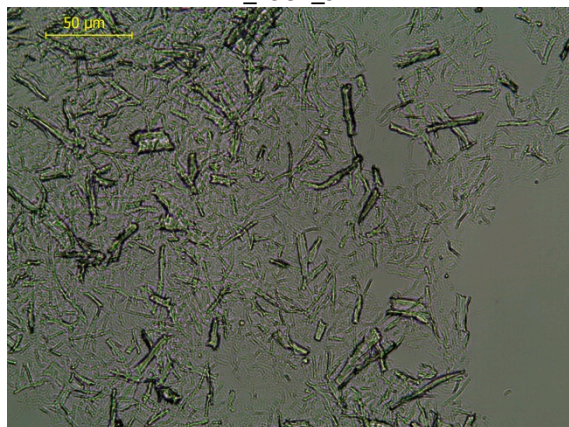

R\_25ox\_15P

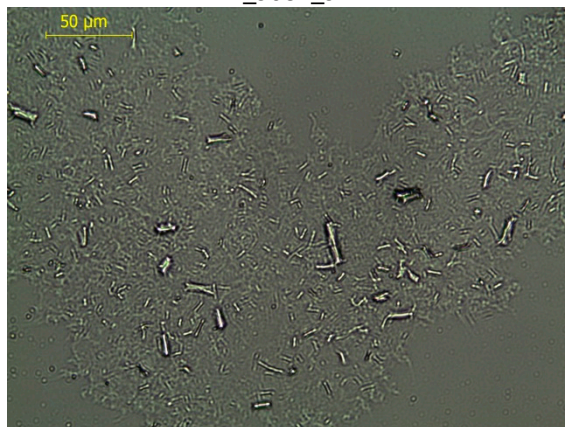

R\_50ox\_15P



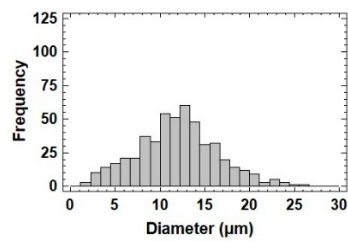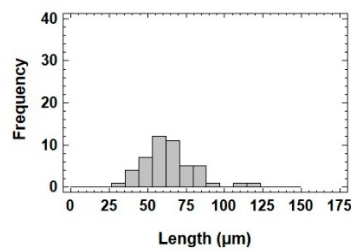

25ox\_Ut\_5P

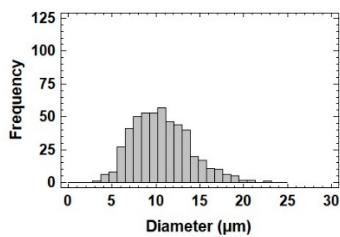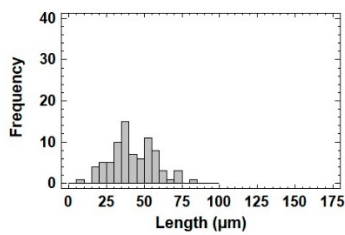

25ox\_Ut\_15P

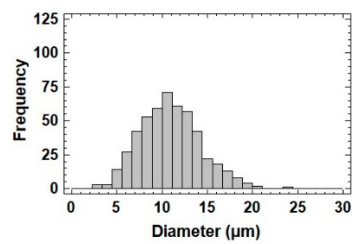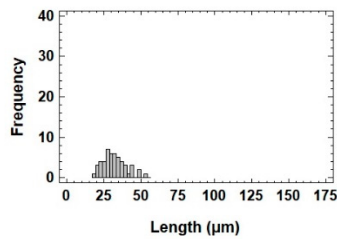

50ox\_Ut\_5P

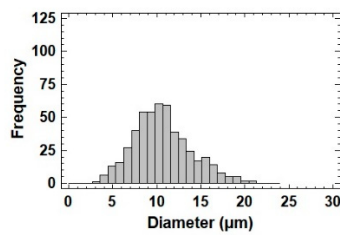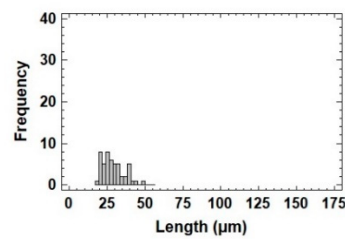

50ox\_Ut\_15P

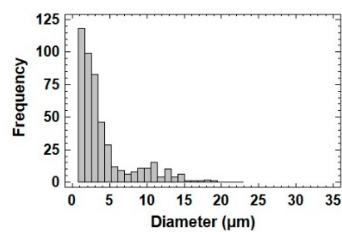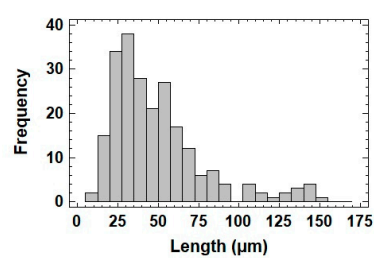

R\_25ox\_5P

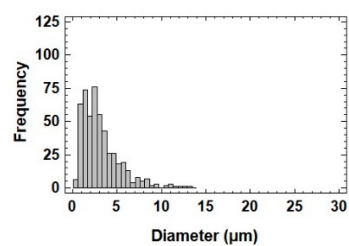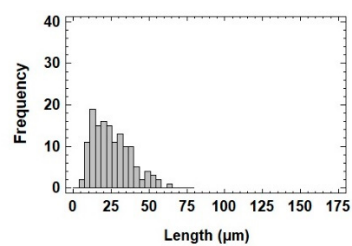

R\_25ox\_15P

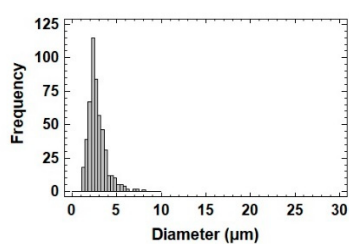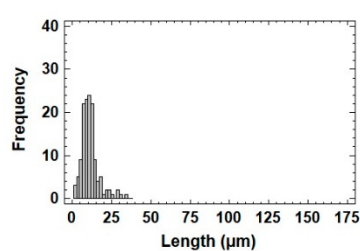

R\_50ox\_5P

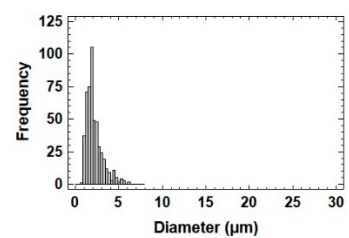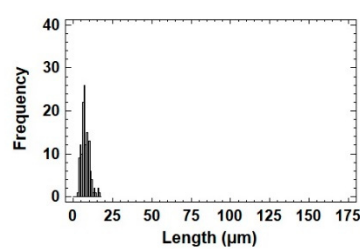

R\_50ox\_15P

Figure S1: OM images (scale of 50  $\mu\text{m}$ ) diameter and length distribution of CMF.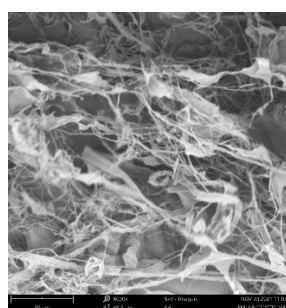

25ox\_Ut\_5P

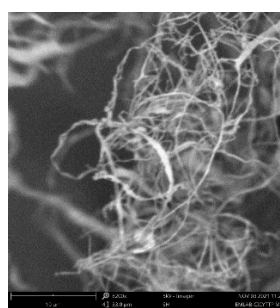

25ox\_Ut\_15P

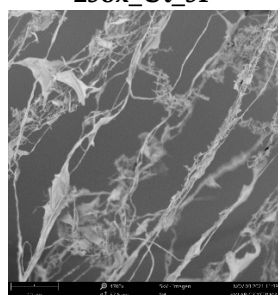

50ox\_Ut\_5P

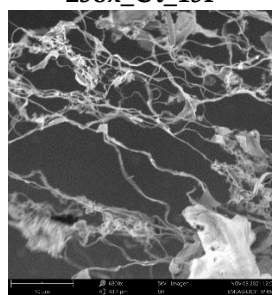

50ox\_Ut\_15P

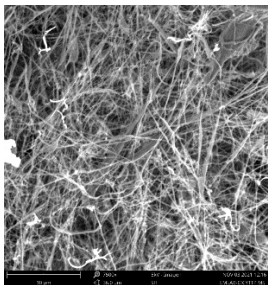

R\_25ox\_5P

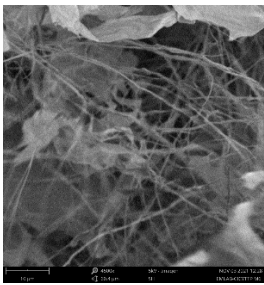

R\_25ox\_15P

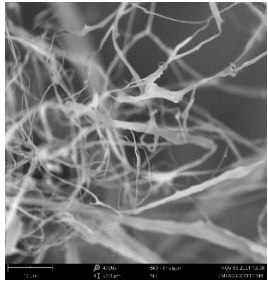

R\_50ox\_5P

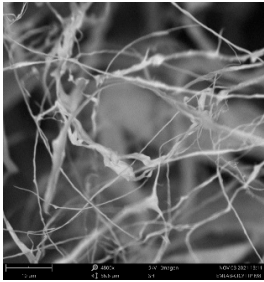

R\_50ox\_15P

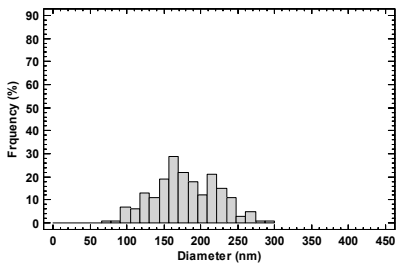

25ox\_Ut\_5P

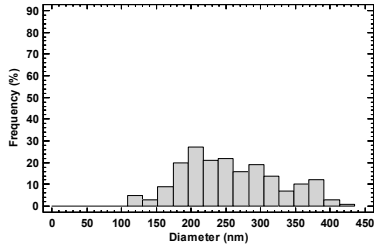

25ox\_Ut\_15P

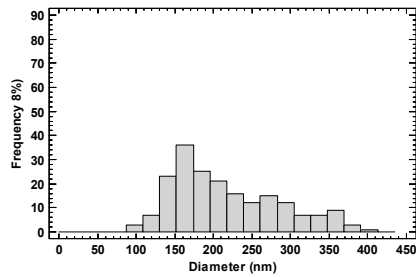

50ox\_Ut\_5P

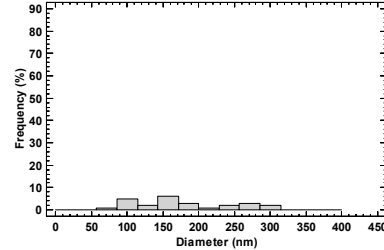

50ox\_Ut\_15P

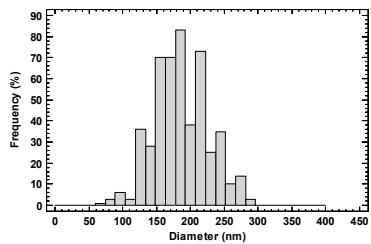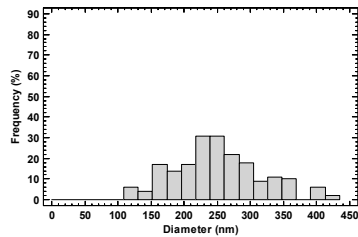

R\_25ox\_5P

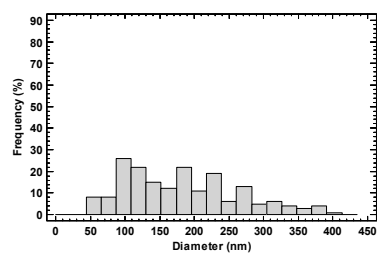

R\_25ox\_15P

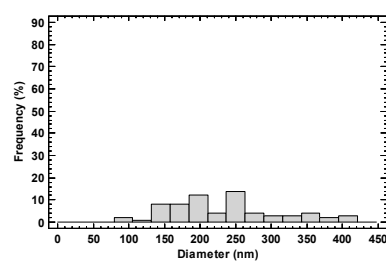

R\_50ox\_5P

R\_50ox\_15P

**Figure S2:** SEM images (scale of 10  $\mu$ m), diameter and length distribution of CMF.



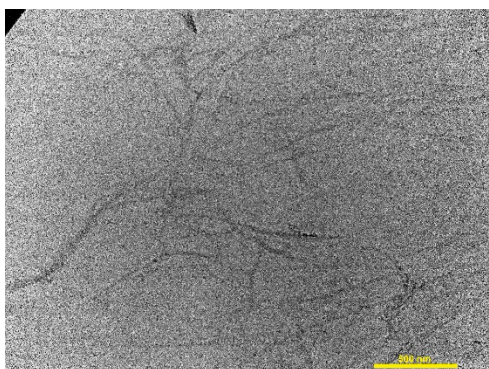**25ox\_Ut\_5P**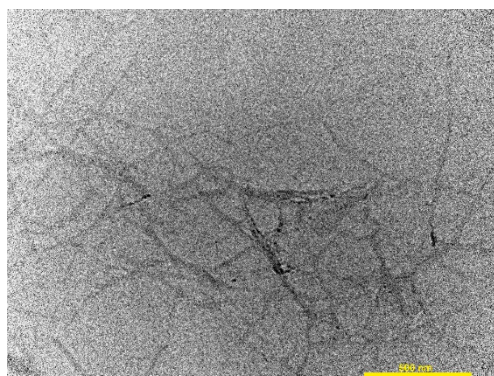**25ox\_Ut\_15P**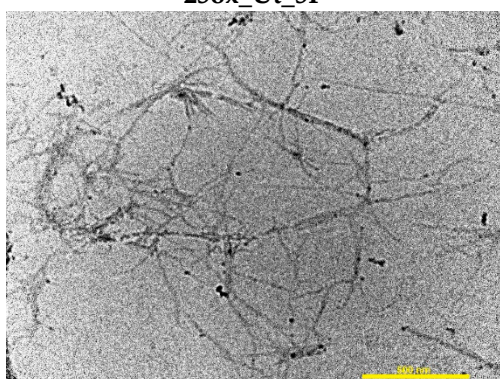**50ox\_Ut\_5P**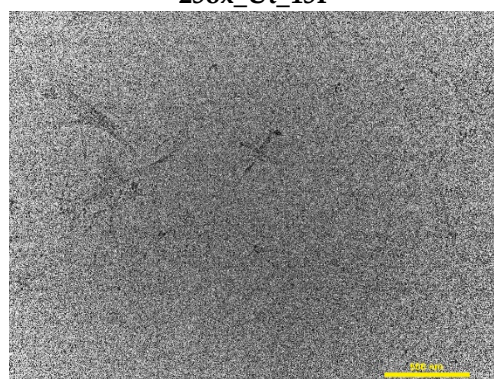**50ox\_Ut\_15P**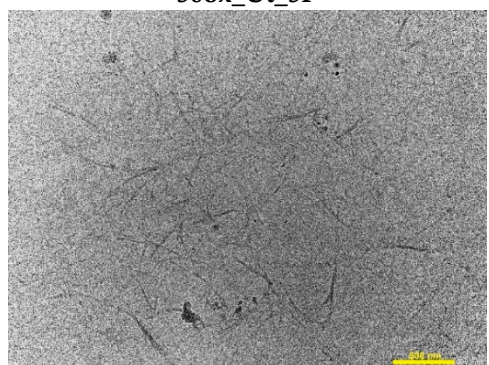**R\_25ox\_5P**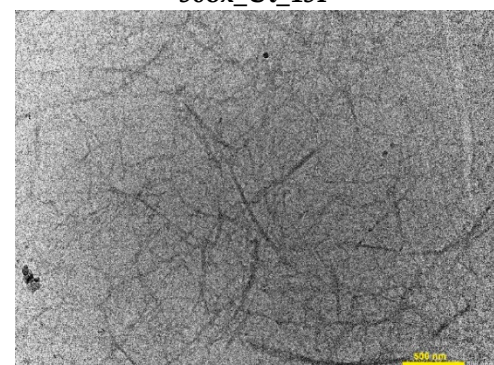**R\_25ox\_15P**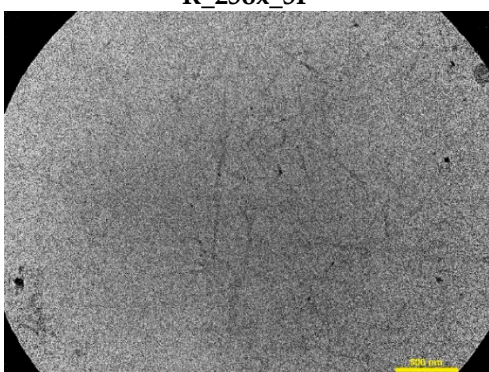**R\_50ox\_5P**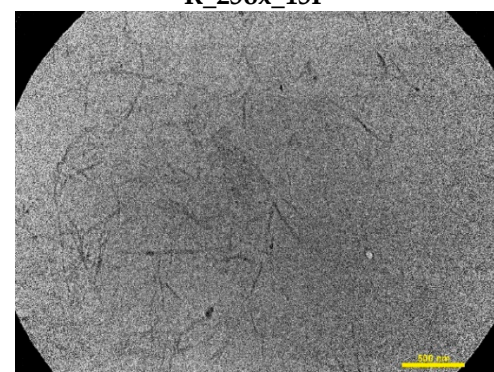**R\_50ox\_15P**

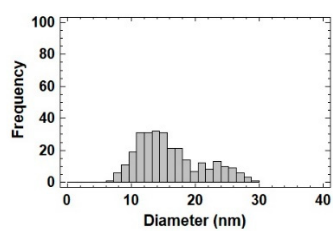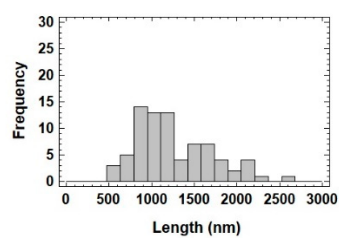

25ox\_Ut\_5P

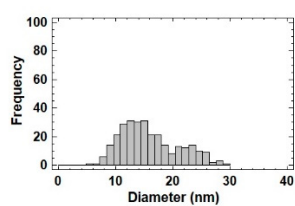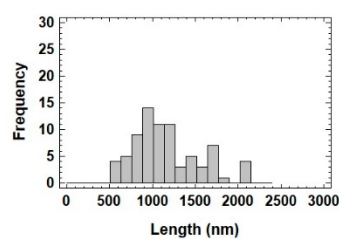

25ox\_Ut\_15P

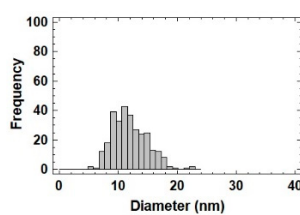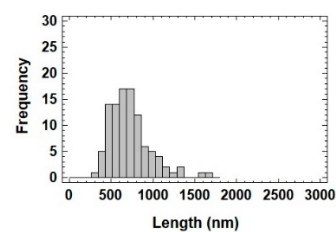

50ox\_Ut\_5P

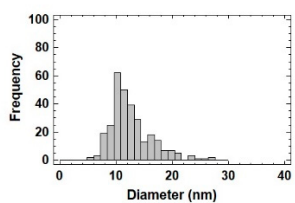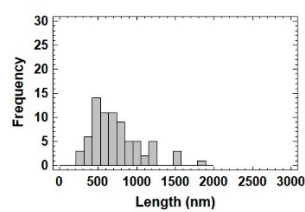

50ox\_Ut\_15P

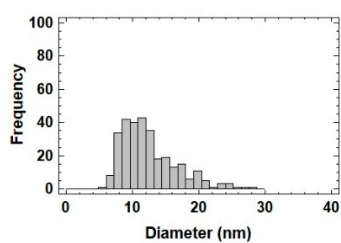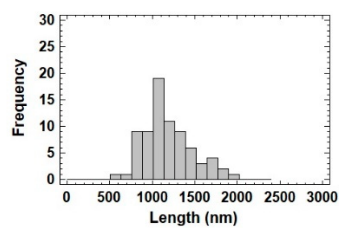

R\_25ox\_5P



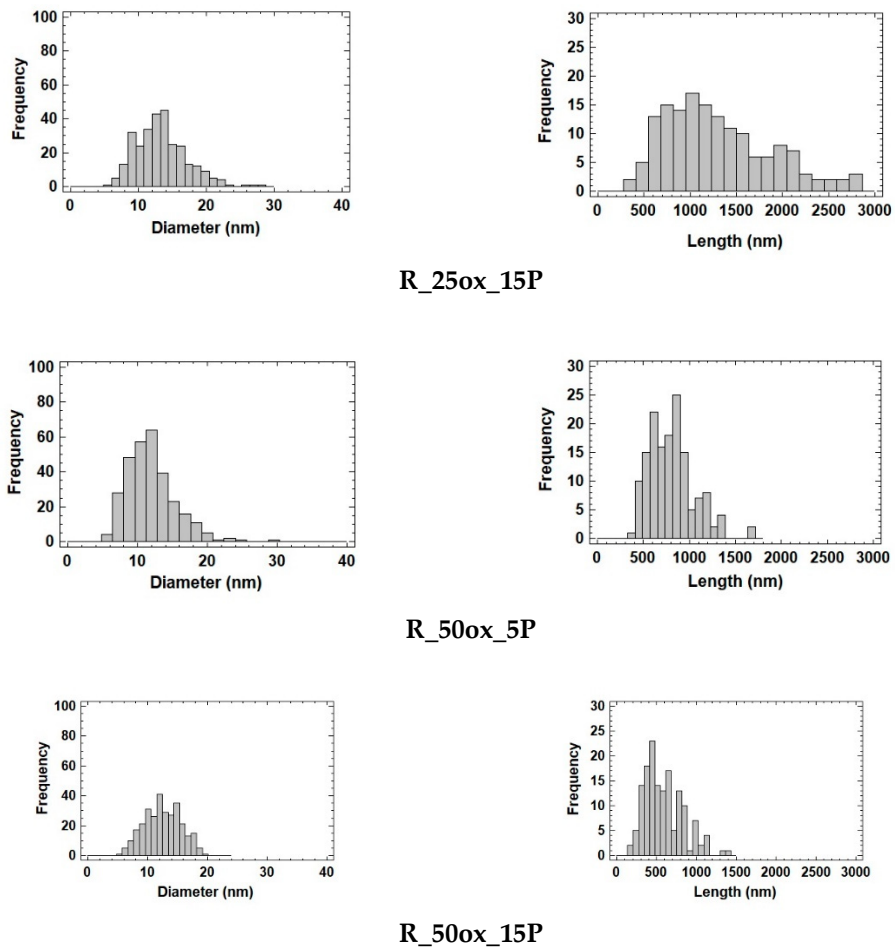

Figure S3: TEM images (scale of 10 nm), diameter and length distribution of CNF.

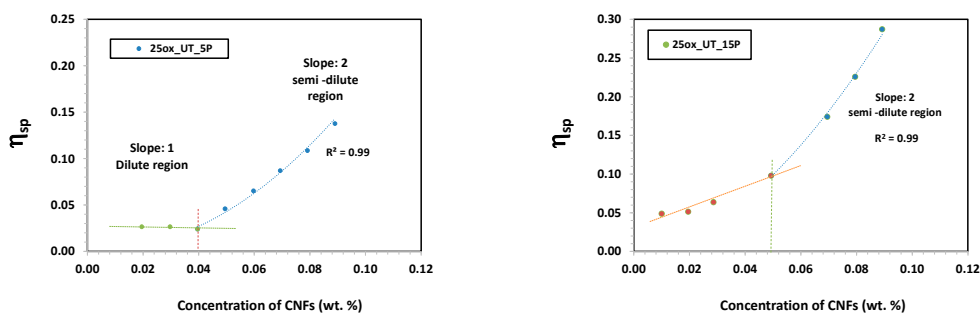

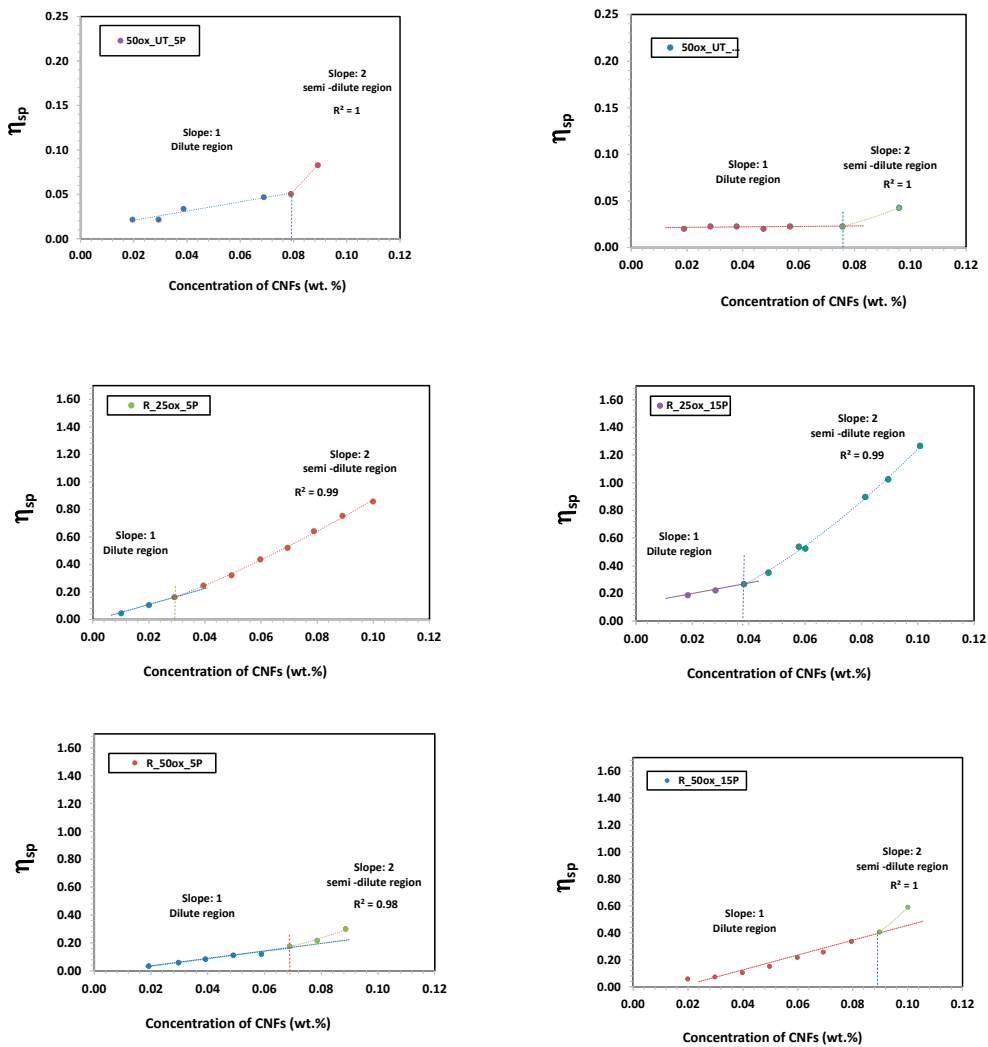

Figure S4: Variation in the specific viscosity,  $\eta_{sp}$  according to the concentration of CNFs.
